# Supplementary material
Source: PubMed Central journal article supplement (PMC8463452)
Supplement: NIHMS1713729-supplement-1.pdf [file NIHMS1713729-supplement-1.pdf]

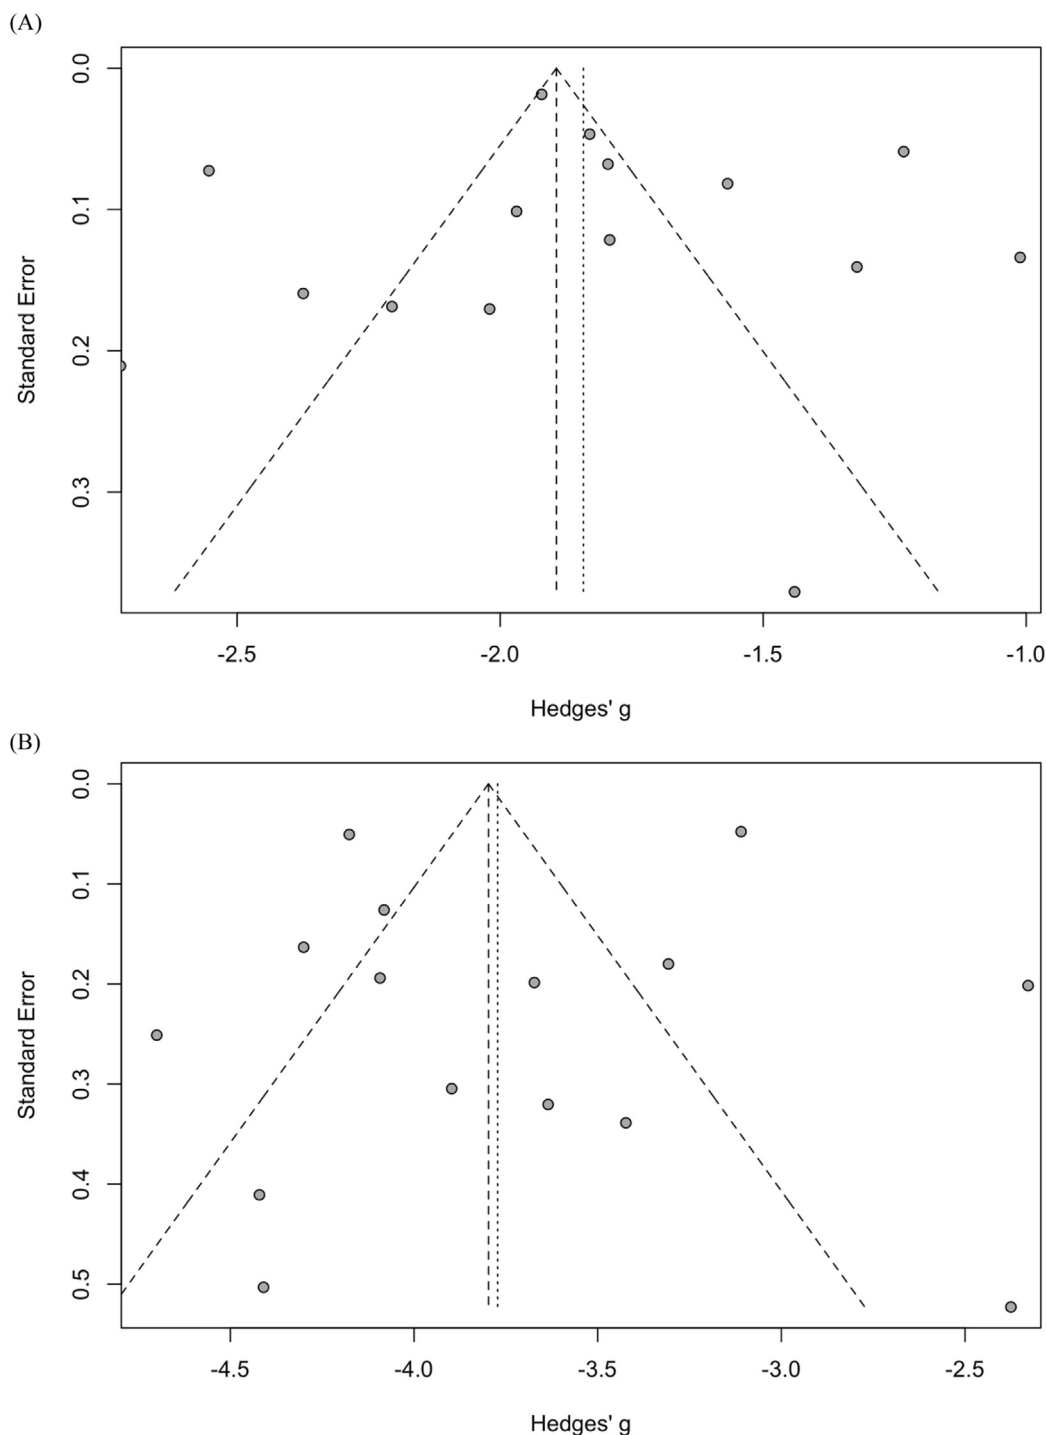

**Supplementary Figure 1.** Funnel plot analyses of studies assessing yield of screening colonoscopy for individuals younger than 50 years. (A) Overall neoplasia (EAO-CRN). (B) Advanced neoplasia (EAO-aCRN).

(A)

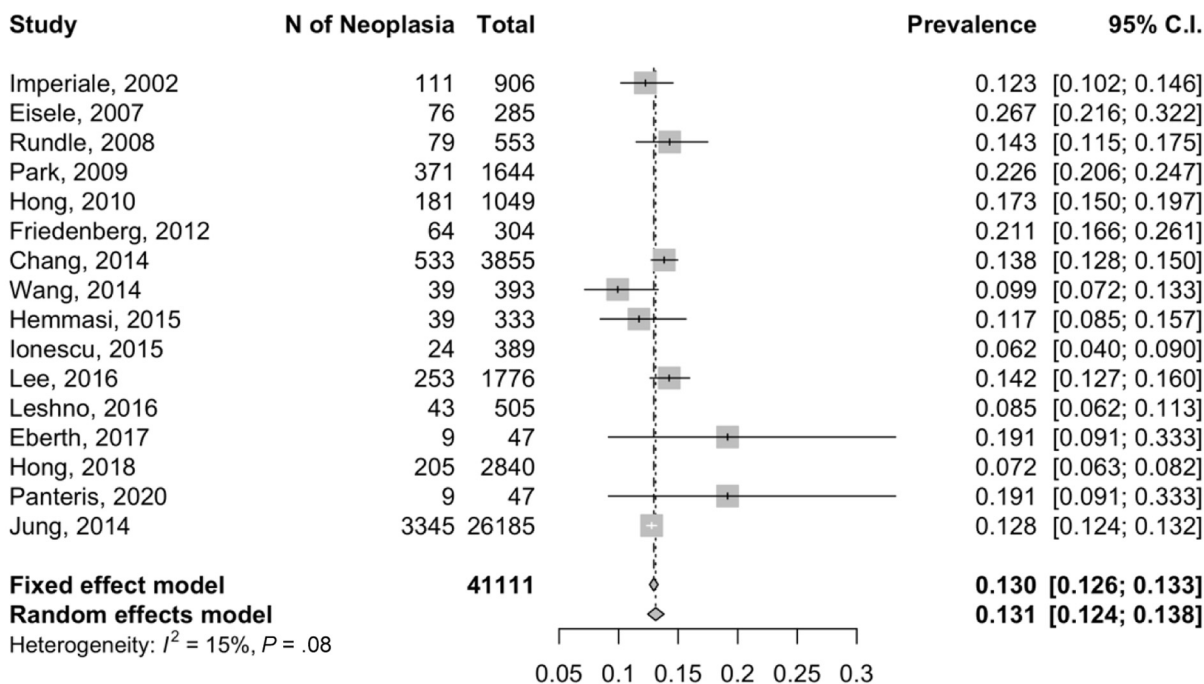

(B)

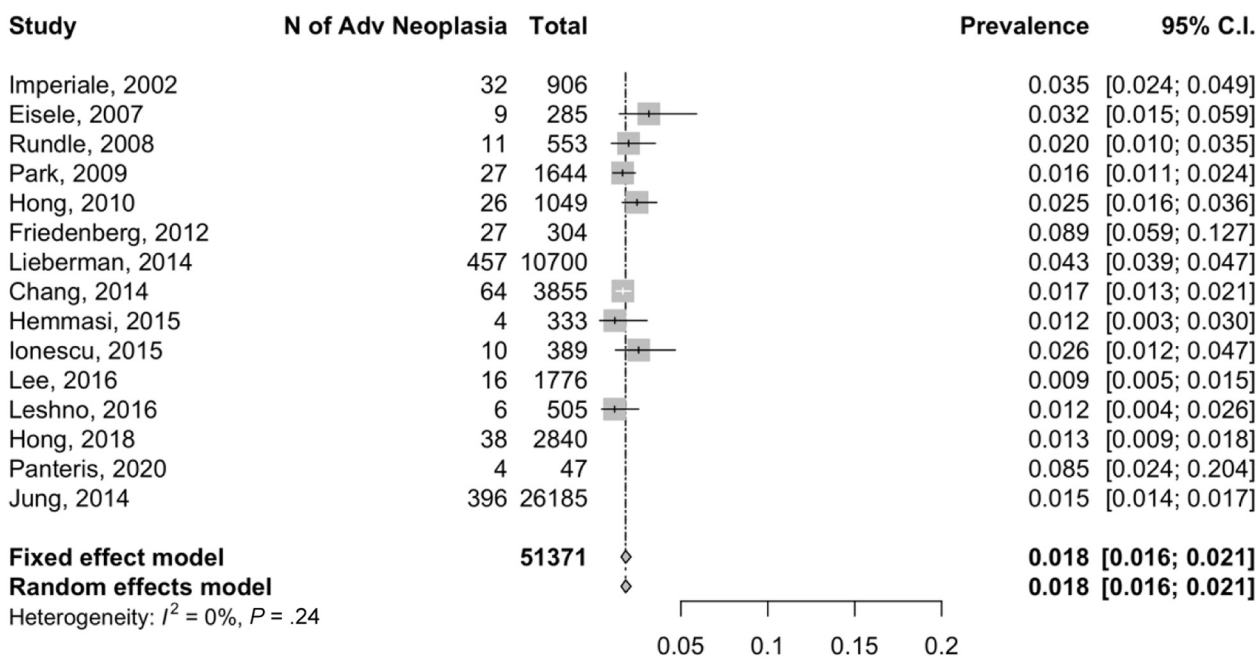

Supplementary Figure 2. Sensitivity analysis excluding outliers. (A) EAO-CRN. (B) EAO-aCRN.

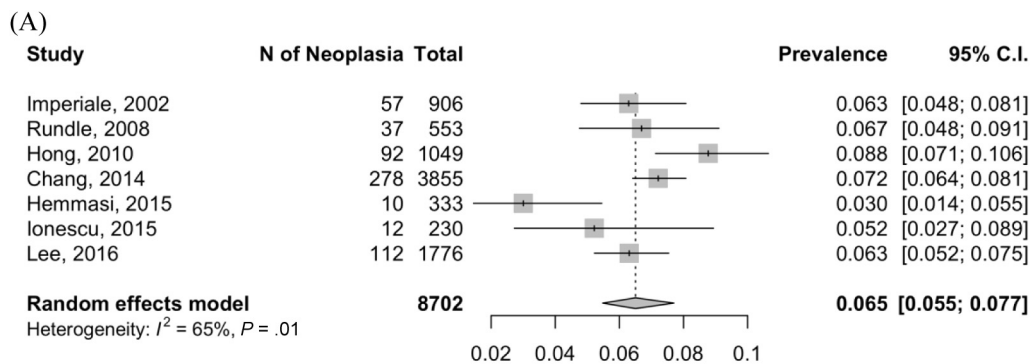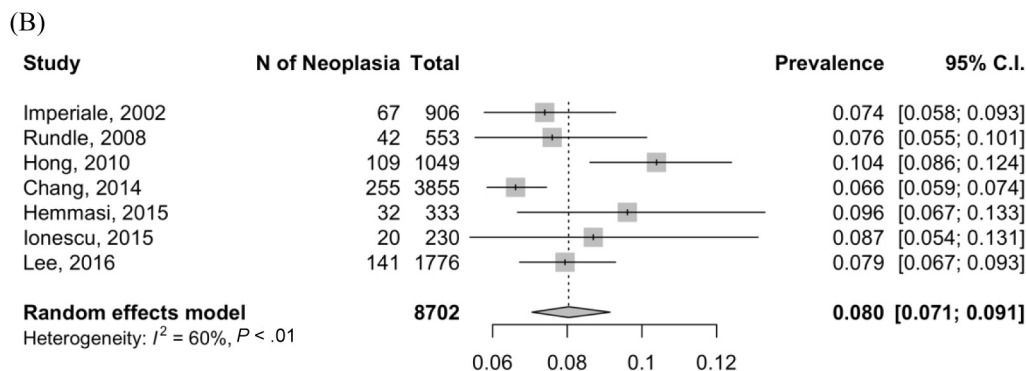

**Supplementary Figure 3.** CRN yield on screening colonoscopy by location within the colon. (A) Proximal EAO-CRN. (B) Distal EAO-CRN.

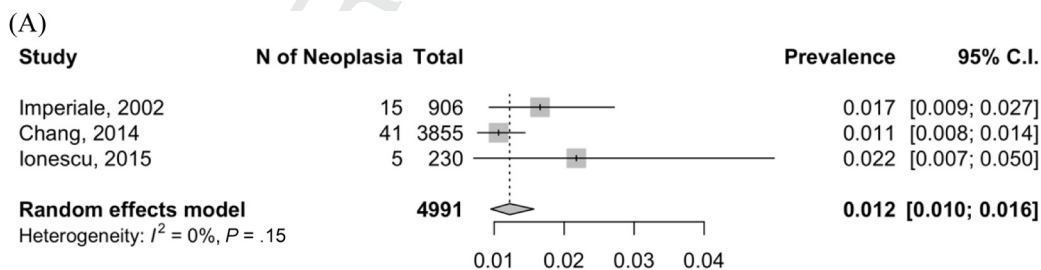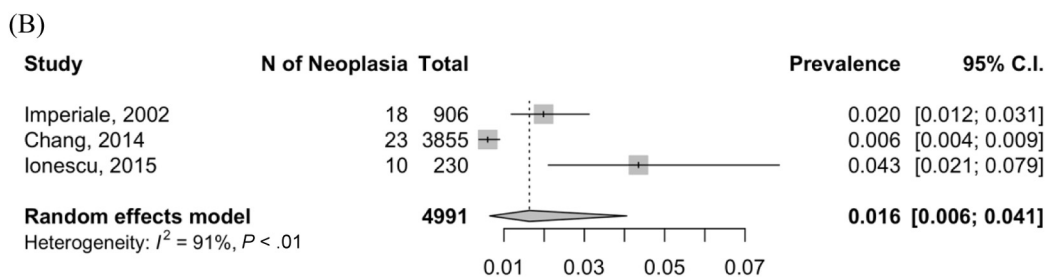

**Supplementary Figure 4.** aCRN yield on screening colonoscopy by location within the colon. (A) Proximal EAO-aCRN. (B) Distal EAO-aCRN.

(A)

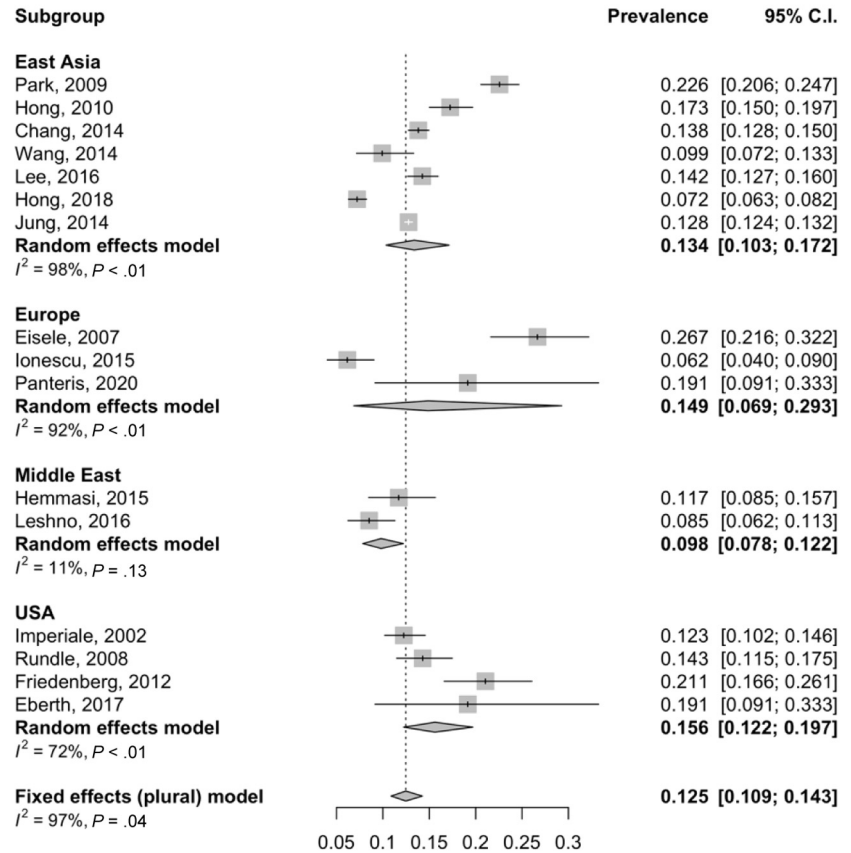

(B)

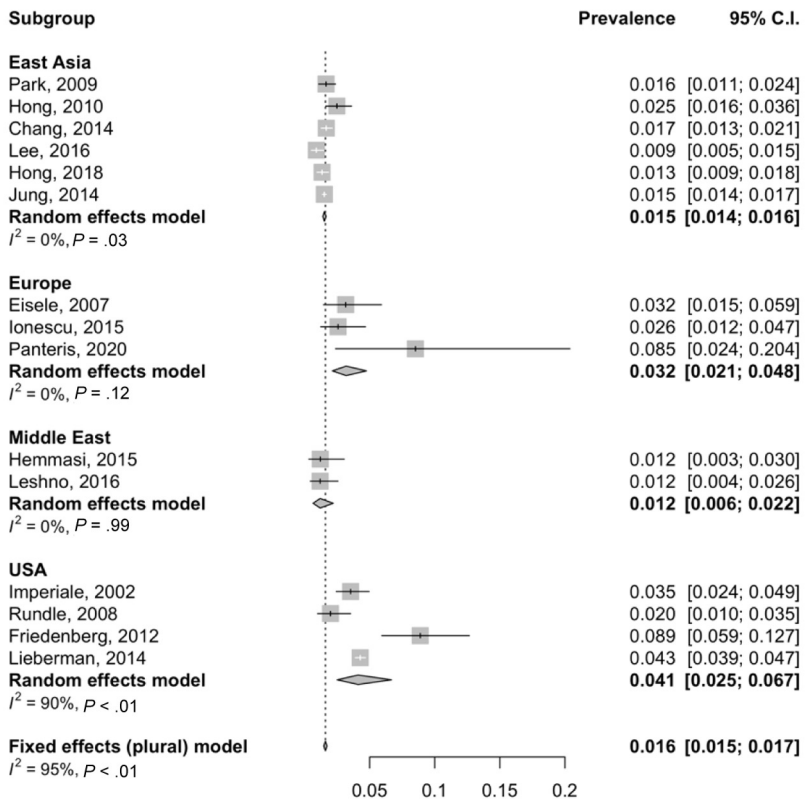

**Supplementary Figure 5.** CRN yield on screening colonoscopy for individuals younger than 50 years by geographic location. (A) Overall neoplasia (EAO-CRN). (B) Advanced neoplasia (EAO-aCRN).

(A)

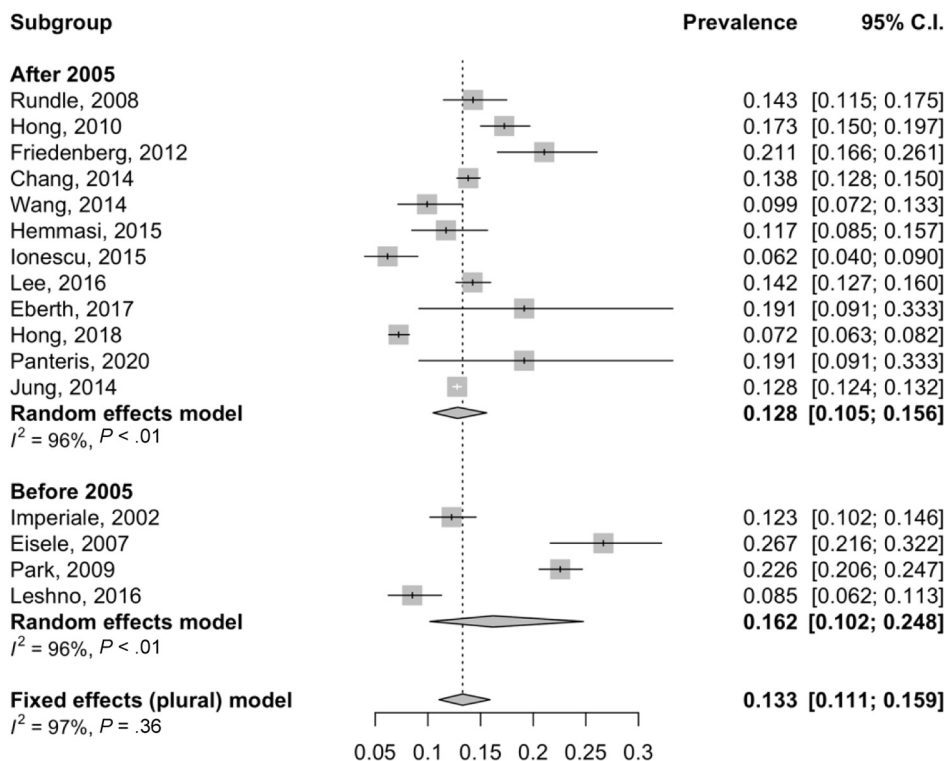

(B)

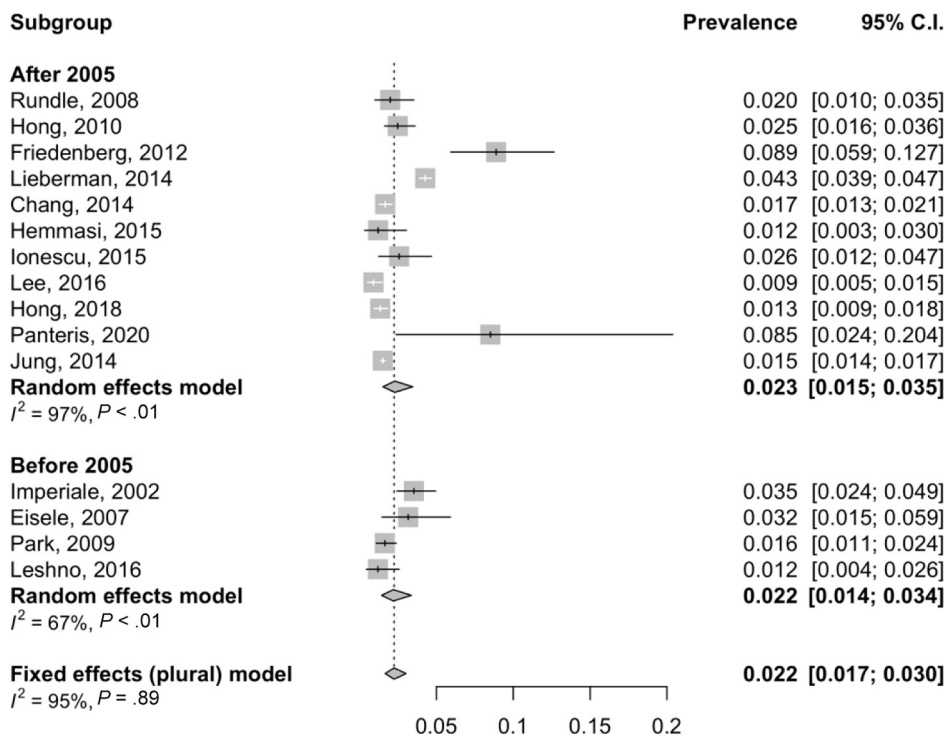

Supplementary Figure 6. CRN yield on screening colonoscopy for individuals younger than 50 years by study start time (before 2005 vs after 2005). (A) EAO-CRN. (B) EAO-aCRN.

(A)

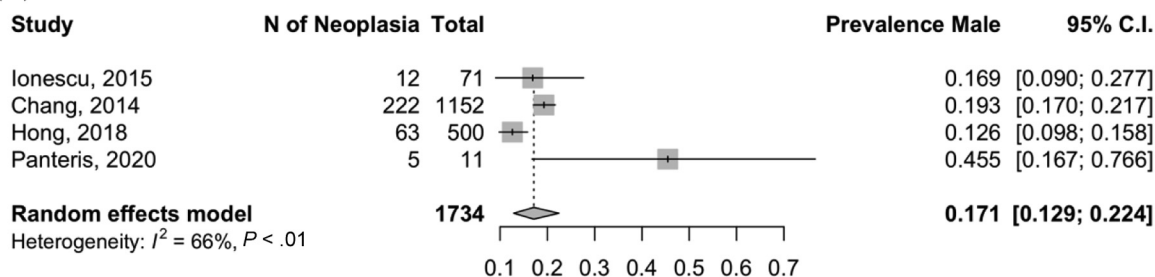

(B)

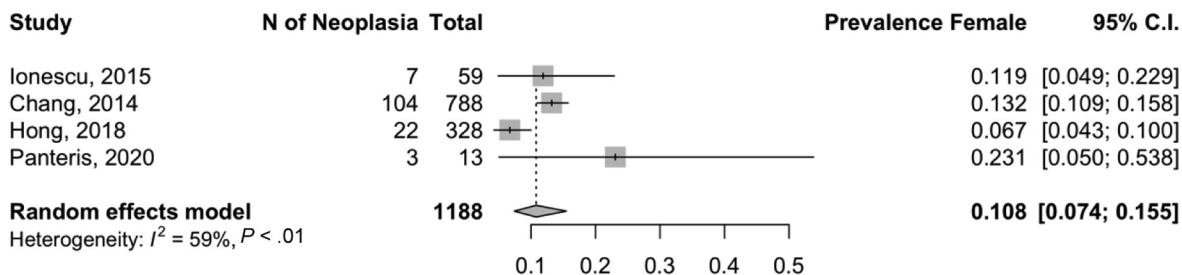

(C)

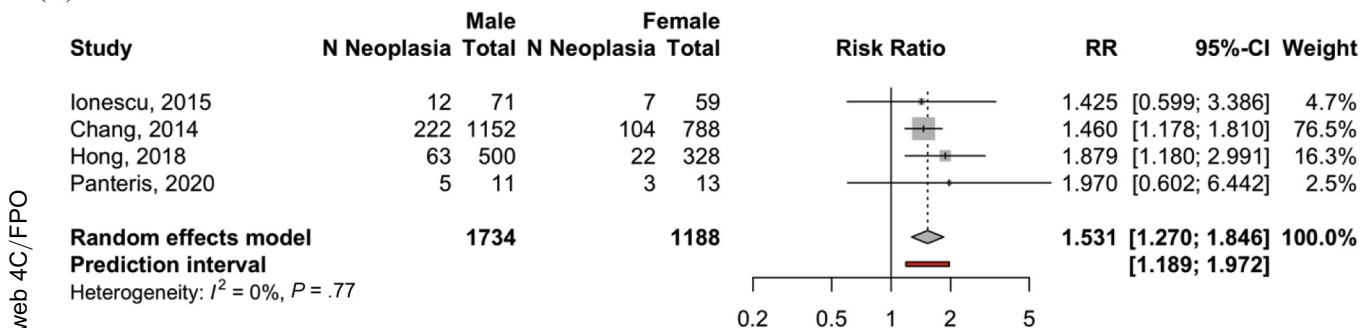

Supplementary Figure 7. CRN yield on screening colonoscopy for age 45–49 years, by sex. (A) Male. (B) Female. (C) Relative risk.

web 4C/FPO

UNCORRECTED

(A)

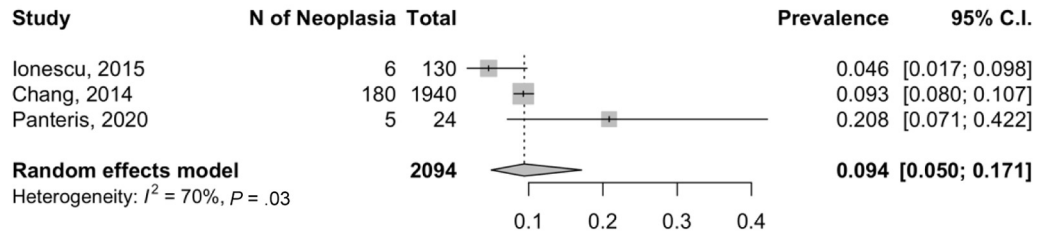

(B)

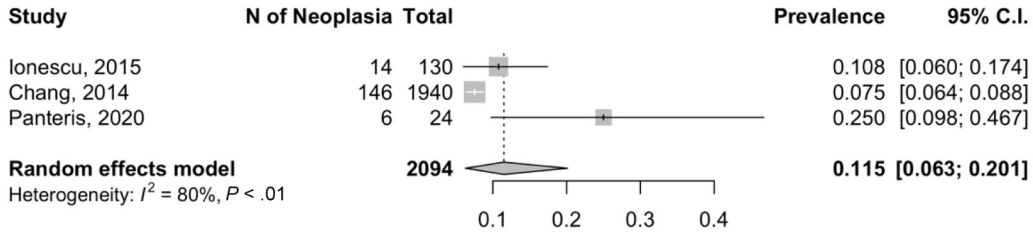

(C)

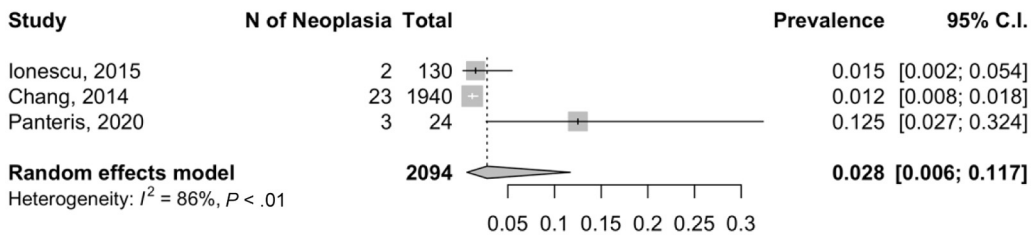

(D)

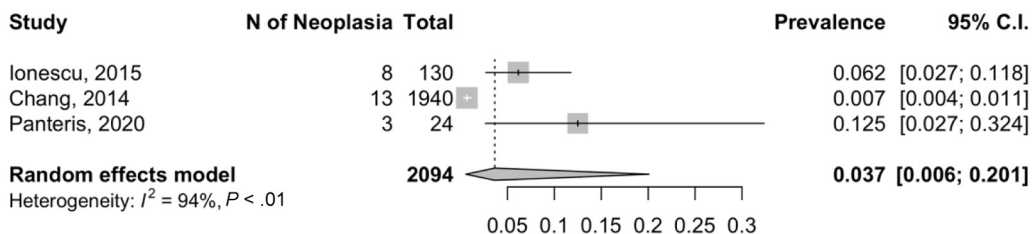

**Supplementary Figure 8.** CRN yield on screening colonoscopy for age 45–49 years, by location within the colon. (A) Proximal EAO-CRN. (B) Distal EAO-CRN. (C) Proximal EAO-aCRN. (D) Distal EAO-aCRN.

**Supplementary Table 1.**Databases Searched: MEDLINE, Embase and Web of Science

MEDLINE (via Ovid MEDLINE® and Epub Ahead of Print, In-Process & Other Non-Indexed Citations, Daily and Versions, 1946 to present)

Search dates = 12/19/2018, 7/28/2020

|    |                                                                    |
|----|--------------------------------------------------------------------|
| 1  | exp Colonic Polyps/                                                |
| 2  | exp Adenoma, Villous/                                              |
| 3  | (exp Adenoma/ or exp Polyps/) and (exp Colonoscopy/ or exp Colon/) |
| 4  | advanced adenoma*.tw,kf.                                           |
| 5  | colon polyp*.tw,kf.                                                |
| 6  | colonic adenoma*.tw,kf.                                            |
| 7  | colonic polyp*.tw,kf.                                              |
| 8  | colorectal adenoma*.tw,kf.                                         |
| 9  | hyperplastic polyp*.tw,kf.                                         |
| 10 | serrated adenoma*.tw,kf.                                           |
| 11 | serrated polyp*.tw,kf.                                             |
| 12 | sessile serrated adenoma*.tw,kf.                                   |
| 13 | sessile serrated polyp*.tw,kf.                                     |
| 14 | traditional serrated adenoma*.tw,kf.                               |
| 15 | tubular adenoma*.tw,kf.                                            |
| 16 | tubulovillous adenoma*.tw,kf.                                      |
| 17 | villous adenoma*.tw,kf.                                            |
| 18 | or/1-17                                                            |
| 19 | exp Incidence/                                                     |
| 20 | exp Prevalence/                                                    |
| 21 | exp Risk/                                                          |
| 22 | inciden*.tw,kf.                                                    |
| 23 | prevalen*.tw,kf.                                                   |
| 24 | rate.tw,kf.                                                        |
| 25 | risk.tw,kf.                                                        |
| 26 | percentage.tw,kf.                                                  |
| 27 | or/19-26                                                           |
| 28 | Adult/                                                             |
| 29 | Young Adult/                                                       |
| 30 | Adolescent/                                                        |
| 31 | Middle Aged/                                                       |
| 32 | Age Factors/                                                       |
| 33 | exp Age of Onset/                                                  |
| 34 | exp Age Distribution/                                              |
| 35 | adult*.tw,kf.                                                      |

**Supplementary Table 1.**Continued

MEDLINE (via Ovid MEDLINE® and Epub Ahead of Print, In-Process & Other Non-Indexed Citations, Daily and Versions, 1946 to present)

Search dates = 12/19/2018, 7/28/2020

|    |                                                                                                                                                                               |
|----|-------------------------------------------------------------------------------------------------------------------------------------------------------------------------------|
| 36 | middle age*.tw,kf.                                                                                                                                                            |
| 37 | man.tw,kf.                                                                                                                                                                    |
| 38 | men.tw,kf.                                                                                                                                                                    |
| 39 | wom#n.tw,kf.                                                                                                                                                                  |
| 40 | ((2* or 3* or 4* or 5* or twenty* or twenties* or thirty* or thirties* or forty* or forties* or fifty* or fifties*) adj3 (age or ages or aged or year or years or old).tw,kf. |
| 41 | or/28-40                                                                                                                                                                      |
| 42 | 18 and 27 and 41                                                                                                                                                              |
| 43 | (exp aged/ or exp child/ or exp infant/) not (adolescent/ or young adult/ or adult/ or middle aged/)                                                                          |
| 44 | 42 not 43                                                                                                                                                                     |
| 45 | exp animals/ not exp humans/                                                                                                                                                  |
| 46 | 44 not 45                                                                                                                                                                     |
| 47 | exp comment/ or exp editorial/ or exp letter/ or (systematic review or meta-analysis or metaanalysis).ti.                                                                     |
| 48 | 46 not 47                                                                                                                                                                     |

Embase (via Elsevier, Embase.com, 1947 to present)

Search date = 12/19/2018

|     |                                                                       |
|-----|-----------------------------------------------------------------------|
| #1  | colon polyp'/exp                                                      |
| #2  | 'villous adenoma'/exp                                                 |
| #3  | ('adenoma'/exp OR 'polyp'/exp) AND ('colonoscopy'/exp OR 'colon'/exp) |
| #4  | 'advanced adenoma*':ab,ti                                             |
| #5  | 'colon polyp*':ab,ti                                                  |
| #6  | 'colonic adenoma*':ab,ti                                              |
| #7  | 'colonic polyp*':ab,ti                                                |
| #8  | 'colorectal adenoma*':ab,ti                                           |
| #9  | 'hyperplastic polyp*':ab,ti                                           |
| #10 | 'serrated adenoma*':ab,ti                                             |
| #11 | 'serrated polyp*':ab,ti                                               |
| #12 | 'sessile serrated adenoma*':ab,ti                                     |
| #13 | 'sessile serrated polyp*':ab,ti                                       |
| #14 | 'traditional serrated adenoma*':ab,ti                                 |

2221  
2222  
2223  
2224  
2225  
2226  
2227  
2228  
2229  
2230  
2231  
2232  
2233  
2234  
2235  
2236  
2237  
2238  
2239  
2240  
2241  
2242  
2243  
2244  
2245  
2246  
2247  
2248  
2249  
2250  
2251  
2252  
2253  
2254  
2255  
2256  
2257  
2258  
2259  
2260  
2261  
2262  
2263  
2264  
2265  
2266  
2267  
2268  
2269  
2270  
2271  
2272  
2273  
2274  
2275  
2276  
2277  
2278  
2279  
2280



Supplementary Table 1. Continued

| Embase (via Elsevier, Embase.com, 1947 to present) |                                                                                                                                                                                 |
|----------------------------------------------------|---------------------------------------------------------------------------------------------------------------------------------------------------------------------------------|
| Search date = 12/19/2018                           |                                                                                                                                                                                 |
| #15                                                | 'tubular adenoma':ab,ti                                                                                                                                                         |
| #16                                                | 'tubulovillous adenoma':ab,ti                                                                                                                                                   |
| #17                                                | 'villous adenoma':ab,ti                                                                                                                                                         |
| #18                                                | #1 OR #2 OR #3 OR #4 OR #5 OR #6 OR #7 OR #8 OR #9 OR #10 OR #11 OR #12 OR #13 OR #14 OR #15 OR #16 OR #17                                                                      |
| #19                                                | 'incidence'/exp                                                                                                                                                                 |
| #20                                                | 'prevalence'/exp                                                                                                                                                                |
| #21                                                | 'risk'/exp                                                                                                                                                                      |
| #22                                                | inciden*:ab,ti                                                                                                                                                                  |
| #23                                                | prevalen*:ab,ti                                                                                                                                                                 |
| #24                                                | rate:ab,ti                                                                                                                                                                      |
| #25                                                | risk:ab,ti                                                                                                                                                                      |
| #26                                                | percentage:ab,ti                                                                                                                                                                |
| #27                                                | #19 OR #20 OR #21 OR #22 OR #23 OR #24 OR #25 OR #26                                                                                                                            |
| #28                                                | 'adult'/de                                                                                                                                                                      |
| #29                                                | 'young adult'/de                                                                                                                                                                |
| #30                                                | 'adolescent'/de                                                                                                                                                                 |
| #31                                                | 'middle aged'/de                                                                                                                                                                |
| #32                                                | 'onset age'/exp                                                                                                                                                                 |
| #33                                                | 'age distribution'/exp                                                                                                                                                          |
| #34                                                | adult*:ab,ti                                                                                                                                                                    |
| #35                                                | 'middle age':ab,ti                                                                                                                                                              |
| #36                                                | man:ab,ti                                                                                                                                                                       |
| #37                                                | men:ab,ti                                                                                                                                                                       |
| #38                                                | wom?:n:ab,ti                                                                                                                                                                    |
| #39                                                | ((2* OR 3* OR 4* OR 5* OR twenty* OR twenties* OR thirty* OR thirties* OR forty* OR forties* OR fifty* OR fifties*) NEAR/3 (age OR ages OR aged OR year OR years OR old)):ab,ti |
| #40                                                | #28 OR #29 OR #30 OR #31 OR #32 OR #33 OR #34 OR #35 OR #36 OR #37 OR #38 OR #39                                                                                                |
| #41                                                | #18 AND #27 AND #40                                                                                                                                                             |
| #42                                                | ('aged'/exp OR 'child'/exp) NOT ('adolescent'/de OR 'young adult'/de OR 'adult'/de OR 'middle aged'/de)                                                                         |
| #43                                                | #41 NOT #42                                                                                                                                                                     |
| #44                                                | [animals]/lim NOT [humans]/lim                                                                                                                                                  |
| #45                                                | #43 NOT #44                                                                                                                                                                     |

Supplementary Table 1. Continued

| Embase (via Elsevier, Embase.com, 1947 to present)                                                                                                                      |                                                                                                                  |      |
|-------------------------------------------------------------------------------------------------------------------------------------------------------------------------|------------------------------------------------------------------------------------------------------------------|------|
| Search date = 12/19/2018                                                                                                                                                |                                                                                                                  |      |
| #46                                                                                                                                                                     | 'note'/exp OR 'editorial'/exp OR 'letter'/exp OR 'systematic review':ti OR 'meta-analysis':ti OR metaanalysis:ti | 2341 |
| #47                                                                                                                                                                     | #45 NOT #46                                                                                                      | 2342 |
| #48                                                                                                                                                                     | #47 AND ('article'/it OR 'article in press'/it OR 'review'/it OR 'short survey'/it)                              | 2343 |
| Web of Science Core Collection (via Clarivate Analytics, including Science Citation Index Expanded 1974 to present, and Social Sciences Citation Index 1974 to present) |                                                                                                                  | 2344 |
| Search date = 12/19/2018                                                                                                                                                |                                                                                                                  | 2345 |
| #1                                                                                                                                                                      | (TS=("advanced adenoma*)) AND DOCUMENT TYPES: (Article OR Abstract of Published Item OR Review)                  | 2346 |
| #2                                                                                                                                                                      | (TS=("colon polyp*)) AND DOCUMENT TYPES: (Article OR Abstract of Published Item OR Review)                       | 2347 |
| #3                                                                                                                                                                      | (TS=("colonic adenoma*)) AND DOCUMENT TYPES: (Article OR Abstract of Published Item OR Review)                   | 2348 |
| #4                                                                                                                                                                      | (TS=("colonic polyp*)) AND DOCUMENT TYPES: (Article OR Abstract of Published Item OR Review)                     | 2349 |
| #5                                                                                                                                                                      | (TS=("colorectal adenoma*)) AND DOCUMENT TYPES: (Article OR Abstract of Published Item OR Review)                | 2350 |
| #6                                                                                                                                                                      | (TS=("hyperplastic polyp*)) AND DOCUMENT TYPES: (Article OR Abstract of Published Item OR Review)                | 2351 |
| #7                                                                                                                                                                      | (TS=("serrated adenoma*)) AND DOCUMENT TYPES: (Article OR Abstract of Published Item OR Review)                  | 2352 |
| #8                                                                                                                                                                      | (TS=("serrated polyp*)) AND DOCUMENT TYPES: (Article OR Abstract of Published Item OR Review)                    | 2353 |
| #9                                                                                                                                                                      | (TS=("sessile serrated adenoma*)) AND DOCUMENT TYPES: (Article OR Abstract of Published Item OR Review)          | 2354 |
| #10                                                                                                                                                                     | (TS=("sessile serrated polyp*)) AND DOCUMENT TYPES: (Article OR Abstract of Published Item OR Review)            | 2355 |
| #11                                                                                                                                                                     | (TS=("traditional serrated adenoma*)) AND DOCUMENT TYPES: (Article OR Abstract of Published Item OR Review)      | 2356 |
| #12                                                                                                                                                                     | (TS=("tubular adenoma*)) AND DOCUMENT TYPES: (Article OR Abstract of Published Item OR Review)                   | 2357 |

**Supplementary Table 1.**Continued

Web of Science Core Collection (via Clarivate Analytics,  
including Science Citation Index Expanded 1974 to present,  
and Social Sciences Citation Index 1974 to present)

Search date = 12/19/2018

#13 (TS=("tubulovillous adenoma\*")) AND DOCUMENT  
TYPES: (Article OR Abstract of Published  
Item OR Review)

#14 (TS=("villous adenoma\*")) AND DOCUMENT  
TYPES: (Article OR Abstract of Published  
Item OR Review)

#15 (#1 OR #2 OR #3 OR #4 OR #5 OR #6 OR #7 OR  
#8 OR #9 OR #10 OR #11 OR #12 OR #13 OR  
#14) AND DOCUMENT TYPES: (Article OR  
Abstract of Published Item OR Review)

#16 (TS=("inciden\*")) AND DOCUMENT TYPES: (Article  
OR Abstract of Published Item OR Review)

#17 (TS=("prevalen\*")) AND DOCUMENT TYPES: (Article  
OR Abstract of Published Item OR Review)

#18 (TS=("rate")) AND DOCUMENT TYPES: (Article OR  
Abstract of Published Item OR Review)

#19 (TS=("risk")) AND DOCUMENT TYPES: (Article OR  
Abstract of Published Item OR Review)

#20 (TS=("percentage")) AND DOCUMENT TYPES: (Article  
OR Abstract of Published Item OR Review)

#21 (#16 OR #17 OR #18 OR #19 OR #20) AND DOCUMENT  
TYPES: (Article OR Abstract of Published Item  
OR Review)

#22 (TS=("adult\*")) AND DOCUMENT TYPES: (Article OR  
Abstract of Published Item OR Review)

#23 (TS=("middle age\*")) AND DOCUMENT TYPES: (Article  
OR Abstract of Published Item OR Review)

#24 (TS=("man")) AND DOCUMENT TYPES: (Article OR  
Abstract of Published Item OR Review)

#25 (TS=("men")) AND DOCUMENT TYPES: (Article OR  
Abstract of Published Item OR Review)

#26 (TS=("wom?n")) AND DOCUMENT TYPES: (Article OR  
Abstract of Published Item OR Review)

#27 (TS(("twenty\*" OR "twenties\*" OR "thirty\*" OR "thirties\*"  
OR "forty\*" OR "forties\*" OR "fifty\*" OR "fifties\*")  
NEAR/3 ("age" OR "ages" OR "aged" OR "year"  
OR "years" OR "old"))) AND DOCUMENT TYPES:  
(Article OR Abstract of Published Item OR Review)

#28 (#22 OR #23 OR #24 OR #25 OR #26 OR #27) AND  
DOCUMENT TYPES: (Article OR Abstract of Published  
Item OR Review)

#29 (#15 AND #21 AND #28) AND DOCUMENT TYPES:  
(Article OR Abstract of Published Item OR Review)

#30 (TI=("systematic review" OR "meta-analysis"  
OR "metaanalysis")) AND DOCUMENT TYPES:  
(Article OR Abstract of Published Item OR Review)

#31 (#29 NOT #30) AND DOCUMENT TYPES: (Article OR  
Abstract of Published Item OR Review)

2461  
2462  
2463  
2464  
2465  
2466  
2467  
2468  
2469  
2470  
2471  
2472  
2473  
2474  
2475  
2476  
2477  
2478  
2479  
2480  
2481  
2482  
2483  
2484  
2485  
2486  
2487  
2488  
2489  
2490  
2491  
2492  
2493  
2494  
2495  
2496  
2497  
2498  
2499  
2500  
2501  
2502  
2503  
2504  
2505  
2506  
2507  
2508  
2509  
2510  
2511  
2512  
2513  
2514  
2515  
2516  
2517  
2518  
2519  
2520

**Supplementary Table 2.** Publication and Outcomes Data for All Included Studies

| First author, year of publication | Country       | Study period            | Risk of bias | No. of patients younger than 50 y | Reason for colonoscopy                                                                           | Data reported <sup>a</sup>                                          |
|-----------------------------------|---------------|-------------------------|--------------|-----------------------------------|--------------------------------------------------------------------------------------------------|---------------------------------------------------------------------|
| Imperiale, 2002 <sup>34</sup>     | United States | 1995–2000               | Low          | 906                               | Employee-sponsored colonoscopy screening                                                         | EAO-CRN, EAO-aCRN, sex, colon location, age 40–49 y                 |
| Eisele, 2007 <sup>35</sup>        | Germany       | 1998–2003               | Low          | 285                               | Health assessment program for male military personnel                                            | EAO-CRN, EAO-aCRN, age 40–49 y                                      |
| Rundle, 2008 <sup>36</sup>        | United States | 2004–2006               | Low          | 553                               | Employee-sponsored wellness examination including colonoscopy screening                          | EAO-CRN, EAO-aCRN, sex, colon location, age 40–49 y,                |
| Park, 2009 <sup>37</sup>          | Korea         | 2003–2004               | Low          | 1644                              | Routine screening                                                                                | EAO-CRN, EAO-aCRN, age 20–29 y, 30–39 y, 40–49 y                    |
| Hong, 2010 <sup>38</sup>          | Korea         | 2005–2009               | Low          | 1049                              | Employee-sponsored wellness program including colonoscopy screening                              | EAO-CRN, EAO-aCRN, sex, colon location, age 40–44 y, 45–49 y,       |
| Friedenberg, 2012 <sup>39</sup>   | United States | 2007–2010               | Low          | 304                               | Routine screening for African Americans                                                          | EAO-CRN, EAO-aCRN, colon location, age 45–49 y                      |
| Lieberman, 2014 <sup>52</sup>     | United States | 2000–2011               | Low          | 10,700                            | Routine screening, all polyps >9 mm                                                              | EAO-aCRN, age <50 y                                                 |
| Chang, 2014 <sup>40</sup>         | Taiwan        | 2006–2009               | Low          | 3855                              | Voluntary health checkup including colonoscopy screening                                         | EAO-CRN, EAO-aCRN, sex, colon location, age 40–44 y, 45–49 y        |
| Wang, 2014 <sup>41</sup>          | Taiwan        | 2009–2011               | Low          | 393                               | Routine screening                                                                                | EAO-CRN, age <45 y                                                  |
| Hemmasi, 2015 <sup>42</sup>       | Iran          | 2009–2012               | Low          | 333                               | Voluntary health checkup including colonoscopy screening                                         | EAO-CRN, EAO-aCRN, sex, colon location, age 40–49 y                 |
| Ionescu, 2015 <sup>43</sup>       | Romania       | 2007–2008 and 2012–2013 | Low          | 389                               | Routine screening                                                                                | EAO-CRN, EAO-aCRN, sex, colon location, age <50 y, 40–44 y, 45–49 y |
| Jung, 2015 <sup>44</sup>          | Korea         | 2010–2011               | Low          | 2319                              | Comprehensive health screening program                                                           | EAO-CRN, EAO-aCRN                                                   |
| Lee, 2016 <sup>45</sup>           | Korea         | 2012–2014               | Low          | 1776                              | Routine health checkup including colonoscopy screening                                           | EAO-CRN, EAO-aCRN, colon location, age <40 y, 40–44 y, 45–49 y      |
| Leshno, 2016 <sup>46</sup>        | Israel        | 1995–2014               | Low          | 505                               | Routine screening                                                                                | EAO-CRN, EAO-aCRN, sex, age 40–49 y                                 |
| Eberth, 2018 <sup>47</sup>        | United States | 2014–2016               | Low          | 47                                | Routine screening for African Americans facilitated by statewide programs for patient navigation | EAO-CRN, age 45–49 y                                                |
| Hong, 2018 <sup>48</sup>          | China         | 2013–2014               | Low          | 2840                              | Routine screening                                                                                | EAO-CRN, EAO-aCRN, sex, age ≤39 y, 40–44 y, 45–49 y                 |
| Panteris, 2020 <sup>49</sup>      | Greece        | 2017                    | Low          | 47                                | Individual request on a free access basis                                                        | EAO-CRN, EAO-aCRN, sex, location, age 45–49 y                       |

**Supplementary Table 3.** Risk of Bias in Included Studies Using the Joanna Briggs Institute's Critical Appraisal Checklist for Studies Reporting Prevalence Data

| First author, year of publication | Sample representativeness | Sampling method | Sample size | Study subjects and setting | Sample coverage | Use of validated metrics for identifying condition | Standard reliable measurement of condition | Appropriate statistical analysis | Response rate |
|-----------------------------------|---------------------------|-----------------|-------------|----------------------------|-----------------|----------------------------------------------------|--------------------------------------------|----------------------------------|---------------|
| Imperiale, 2002 <sup>34</sup>     | Yes                       | No              | Yes         | Yes                        | Yes             | Yes                                                | Yes                                        | Yes                              | NA            |
| Eisele, 2007 <sup>35</sup>        | No                        | No              | Yes         | Yes                        | Yes             | Yes                                                | Yes                                        | Yes                              | NA            |
| Rundle, 2008 <sup>36</sup>        | Yes                       | No              | Yes         | Yes                        | Yes             | Yes                                                | Yes                                        | Yes                              | NA            |
| Park, 2009 <sup>37</sup>          | Yes                       | No              | Yes         | Yes                        | Yes             | Yes                                                | Yes                                        | Yes                              | NA            |
| Hong, 2010 <sup>38</sup>          | Yes                       | No              | Yes         | Yes                        | Yes             | Yes                                                | Yes                                        | Yes                              | NA            |
| Friedenberg, 2012 <sup>39</sup>   | No                        | No              | Yes         | Yes                        | Yes             | Yes                                                | Yes                                        | Yes                              | NA            |
| Lieberman, 2014 <sup>52</sup>     | Yes                       | No              | Yes         | Yes                        | Yes             | Yes                                                | Yes                                        | Yes                              | NA            |
| Chang, 2014 <sup>40</sup>         | Yes                       | No              | Yes         | Yes                        | Yes             | Yes                                                | Yes                                        | Yes                              | NA            |
| Wang, 2014 <sup>41</sup>          | Yes                       | No              | Yes         | Yes                        | Yes             | Yes                                                | Yes                                        | Yes                              | NA            |
| Hemmasi, 2015 <sup>42</sup>       | Yes                       | No              | Yes         | Yes                        | Yes             | Yes                                                | Yes                                        | Yes                              | NA            |
| Ionescu, 2015 <sup>43</sup>       | Yes                       | No              | Yes         | Yes                        | Yes             | Yes                                                | Yes                                        | Yes                              | NA            |
| Jung, 2015 <sup>44</sup>          | Yes                       | No              | Yes         | Yes                        | Yes             | Yes                                                | Yes                                        | Yes                              | NA            |
| Lee, 2016 <sup>45</sup>           | Yes                       | No              | Yes         | Yes                        | Yes             | Yes                                                | Yes                                        | Yes                              | NA            |
| Leshno, 2016 <sup>46</sup>        | Yes                       | No              | Yes         | Yes                        | Yes             | Yes                                                | Yes                                        | Yes                              | NA            |
| Eberth, 2018 <sup>47</sup>        | No                        | No              | Yes         | Yes                        | Yes             | Yes                                                | Yes                                        | Yes                              | NA            |
| Hong, 2018 <sup>48</sup>          | Yes                       | No              | Yes         | Yes                        | Yes             | Yes                                                | Yes                                        | Yes                              | NA            |
| Panteris, 2020 <sup>49</sup>      | Yes                       | No              | Yes         | Yes                        | Yes             | Yes                                                | Yes                                        | Yes                              | NA            |

NA, not applicable

2701  
2702  
2703  
2704  
2705  
2706  
2707  
2708  
2709  
2710  
2711  
2712  
2713  
2714  
2715  
2716  
2717  
2718  
2719  
2720  
2721  
2722  
2723  
2724  
2725  
2726  
2727  
2728  
2729  
2730  
2731  
2732  
2733  
2734  
2735  
2736  
2737  
2738  
2739  
2740  
2741  
2742  
2743  
2744  
2745  
2746  
2747  
2748  
2749  
2750  
2751  
2752  
2753  
2754  
2755  
2756  
2757  
2758  
2759  
2760
